# Supplementary material for: Assessment of Antibiofilm Potencies of Nervonic and Oleic Acid against Acinetobacter baumannii Using In Vitro and Computational Approaches
Source: MDPI journal article supplement (doi:10.3390/biomedicines9091133), 2021-09-01
Supplement: s1 [file s1]

## **Supplementary Data**

### **Assessment of antibiofilm potencies of nervonic and oleic acid against *Acinetobacter baumannii* using *in vitro* and computational approaches**

Sagar Kiran Khadke<sup>1</sup>, Jin-Hyung Lee<sup>1</sup>, Yong-Guy Kim<sup>1</sup>, Vinit Raj<sup>1</sup>, Jintae Lee<sup>1\*</sup>

<sup>1</sup>*School of Chemical Engineering, Yeungnam University, Gyeongsan, 38541, Republic of Korea*

**\*Corresponding author:** E-mail: jtleee@ynu.ac.kr

Phone: 82-53-810-2533, Fax: 82-53-810-4631

## Amino acids sequence

Acyl-homoserine-lactone synthase > B0FLN1 (*A. baumannii*) 184 amino acids[1]

MNIIAGFQNNFSEGLYTKFKSYRYRVFVEYLGWELNCPNNEETRIQFDKVDYAYVV  
AQDRESNIIGCARLLPTTQPYLLGEIFPQLLNGMPIPCSPEIWELSRFSAVDFSKPPSSSS  
QAVSSPISIAILQEAINFAREQGAKQLITTSPLGVERLLRAAGFRAHRAGPPMMIDGYS  
MFACLIDV

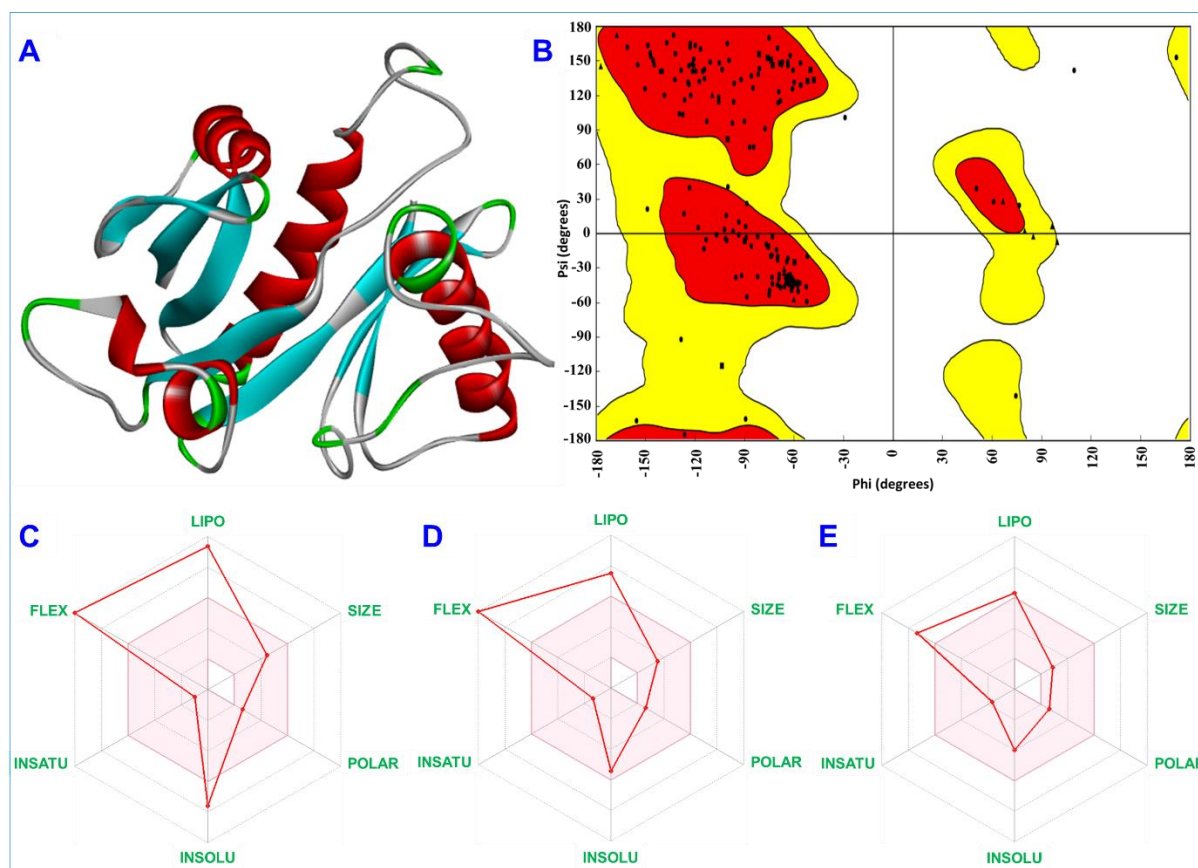

**Supplementary Figure S1.** Homological modeling of acyl-homoserine-lactone synthase: three-dimensional structure of acyl-homoserine-lactone synthase receptor (**A**), conformational validation of acyl-homoserine-lactone synthase by Ramachandran plot (**B**), ADME analysis for the selected long chain fatty acids using Swiss ADME server by using drug 2D structural formula for calculating the properties Lipophilicity (LIPO), size, polarity (POLAR), insolubility in water (INSOLU), instauration (INSATU), and flexibility (FLEX) nervonic acid (**C**), oleic acid (**D**), and myristoleic acid (**E**).

**Supplementary Table S1.** Various physicochemical parameters of fatty acids to reveal the possible ADME properties.

| Parameters                       | Value                                          |                                                |                                                |
|----------------------------------|------------------------------------------------|------------------------------------------------|------------------------------------------------|
|                                  | Nervonic acid                                  | Oleic acid                                     | Myristoleic acid                               |
| Formula                          | C <sub>24</sub> H <sub>46</sub> O <sub>2</sub> | C <sub>18</sub> H <sub>34</sub> O <sub>2</sub> | C <sub>14</sub> H <sub>26</sub> O <sub>2</sub> |
| Molecular Weight                 | 366.62                                         | 282.46                                         | 226.36                                         |
| H-bond acceptors                 | 2                                              | 2                                              | 2                                              |
| H-bond donors                    | 1                                              | 1                                              | 1                                              |
| Topological Polar Surface Area   | 37.3                                           | 37.3                                           | 37.3                                           |
| Gastrointestinal absorption      | Low                                            | High                                           | High                                           |
| Blood Brain Barrier permeability | No                                             | No                                             | Yes                                            |
| Lipinski violations              | 1                                              | 1                                              | 0                                              |
| Bioavailability Score            | 0.85                                           | 0.85                                           | 0.85                                           |
| CYP2C19 inhibitor                | No                                             | No                                             | No                                             |

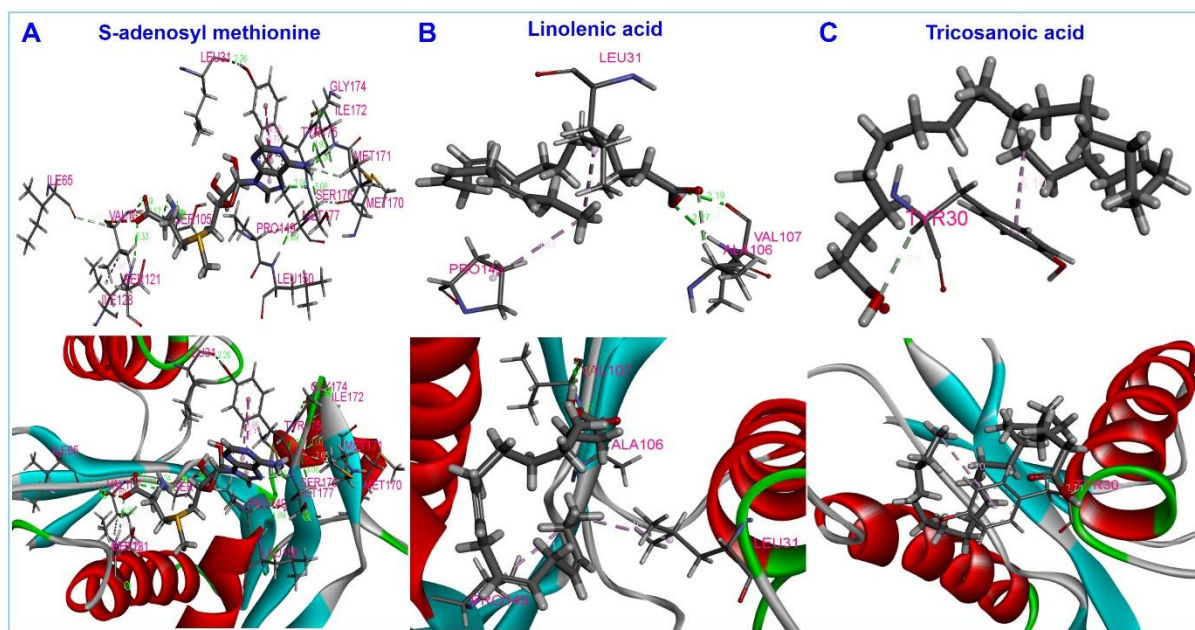

**Supplementary Figure S2.** Ligands with AbaI receptor protein interactions of s-adenosyl methionine (A), linolenic (B), and tricosanoic acid (C).

## References

1. Niu, C.; Clemmer, K.M.; Bonomo, R.A.; Rather, P.N. Isolation and characterization of an autoinducer synthase from *Acinetobacter baumannii*. *J. Bacteriol.* **2008**, *190*, 3386-3392, doi:10.1128/JB.01929-07.
